# Supplementary material for: Induced cell fate transitions at multiple cell layers configure haustorium development in parasitic plants
Source: PubMed Central journal article supplement (PMC6078332; doi:10.1242/dev.164848), 2018-07-23
Supplement: develop-145-164848-s1.pdf [file develop-145-164848-s1.pdf]

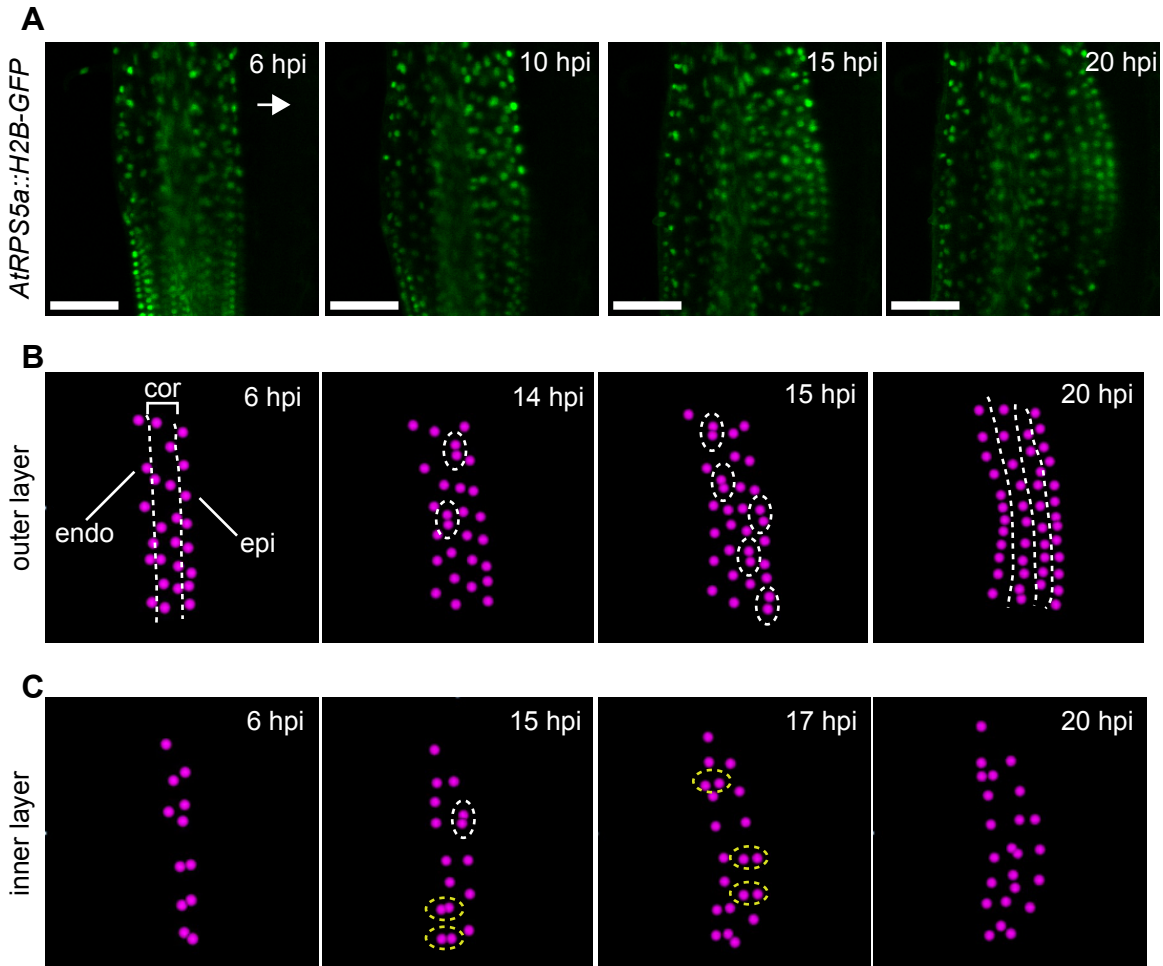

**Supplementary figure 1. Nuclei tracking in early developmental stages of haustorium development.** (A) Time-lapse observation of cell division during early haustorium development in *P. japonicum* root expressing nuclear localized GFP. Confocal photos were taken at 20 minutes intervals for 14 hours (6 hpi ~ 20 hpi). Selected photos at indicated time points are shown. Arrow indicates the direction of haustorium growth. GFP fluorescence is shown in green. Bar = 100  $\mu$ m. (B, C) Results of nuclei tracking using the Trackmate software based on sequential confocal photos shown in (A). Purple circle indicates one nucleus. White dotted circles indicate anticlinal divisions. Yellow dotted circles indicate periclinal divisions. (B) Nuclei in the outer four cell layers are shown as indicated. hpi, hours post infection; epi, epidermis; cor, cortex; endo, endodermis. White dotted lines delineate layers. (C) Nuclei in the inner layers are shown.

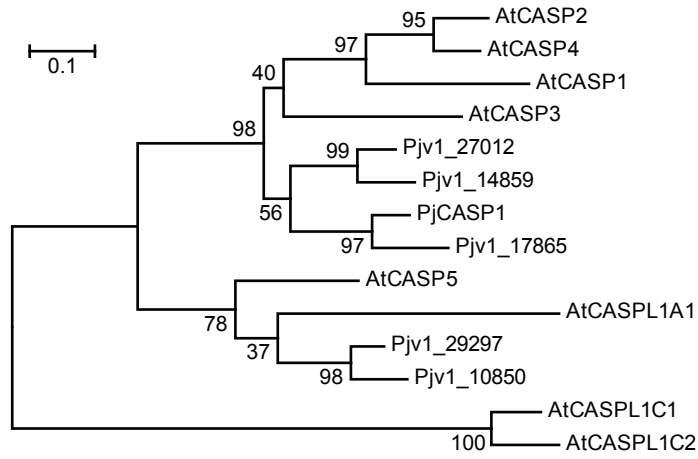

**Supplementary figure 2.** The phylogenetic tree for *A. thaliana* (At) and *P. japonicum* (Pj) CASP proteins. Amino acid substitutions per site is shown on the scale bar.

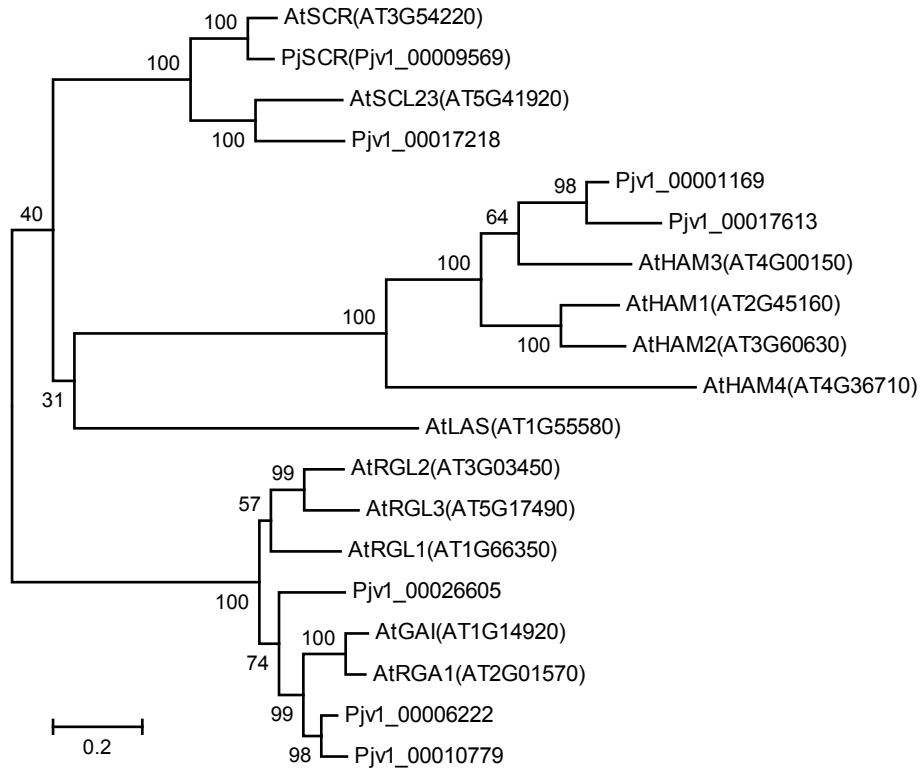

**Supplementary figure 3. The phylogenetic tree for *A. thaliana* (At) and *P. japonicum* (Pj) GRAS type transcription factors in subclades SCARECROW (SCR), HAIRY MERISTEM (HAM), and DELLA. Amino acid substitutions per site are shown on the scale bar.**

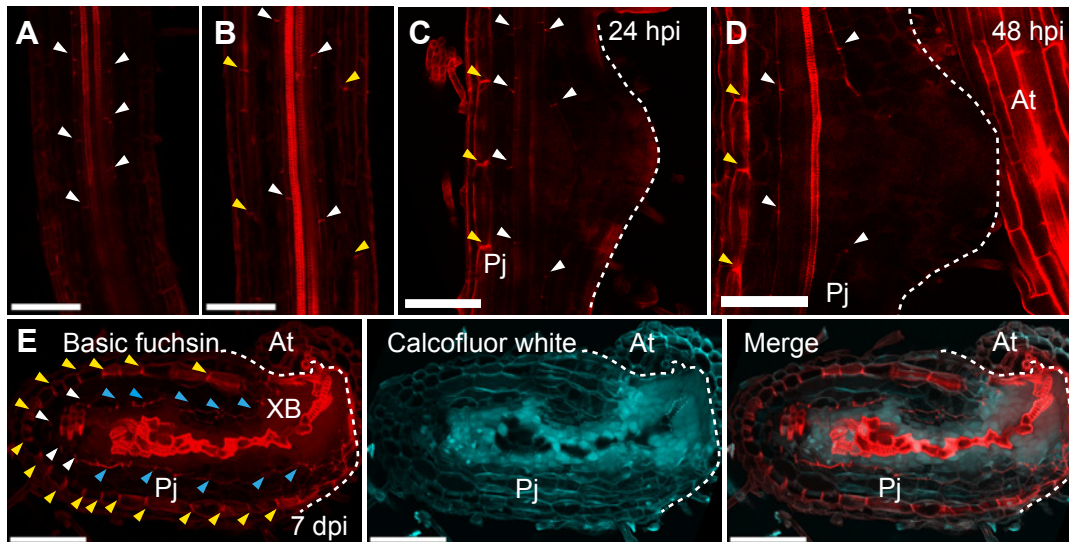

**Supplementary figure 4. Casparian strip formation during haustorium development.** (A) The onset of Casparian strip formation in endodermis in *P. japonicum* root. (B) The onset of Casparian strip formation in exodermis in *P. japonicum* root. (C) and (D) Basic fuchsin staining of haustoria at the indicated time points. (E) Basic fuchsin and calcofluor white staining of the hand-sectioned haustorium at 7 days post infection. Basic fuchsin fluorescence is in red. Calcofluor white fluorescent is in cyan. White arrowheads point Casparian strips in endodermis. Yellow arrowheads point Casparian strips in exodermis. Cyan arrowheads point lignin depositions surrounding xylem bridge. White broken lines indicate outlines of haustoria. Maximum projection images from 2 ~ 4 confocal photos are shown. Eight to ten haustoria were observed in each time points. hpi, hours post infection; Pj, *P. japonicum* root; At, *A. thaliana* root; XB, xylem bridge. Bar = 100  $\mu$ m.

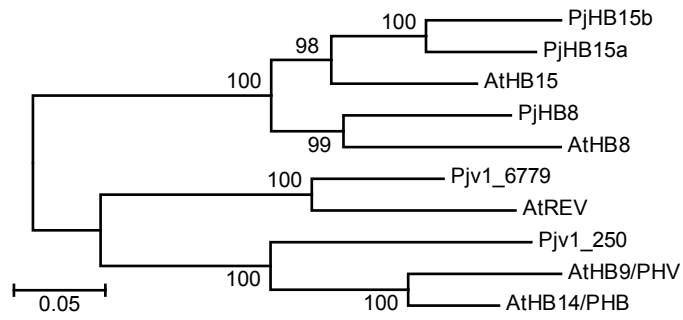

**Supplementary figure 5. The phylogenetic tree for *A. thaliana* (At) and *P. japonicum* (Pj) HD-ZIP III transcription factors.** Scale bar represents amino acid substitutions per site.

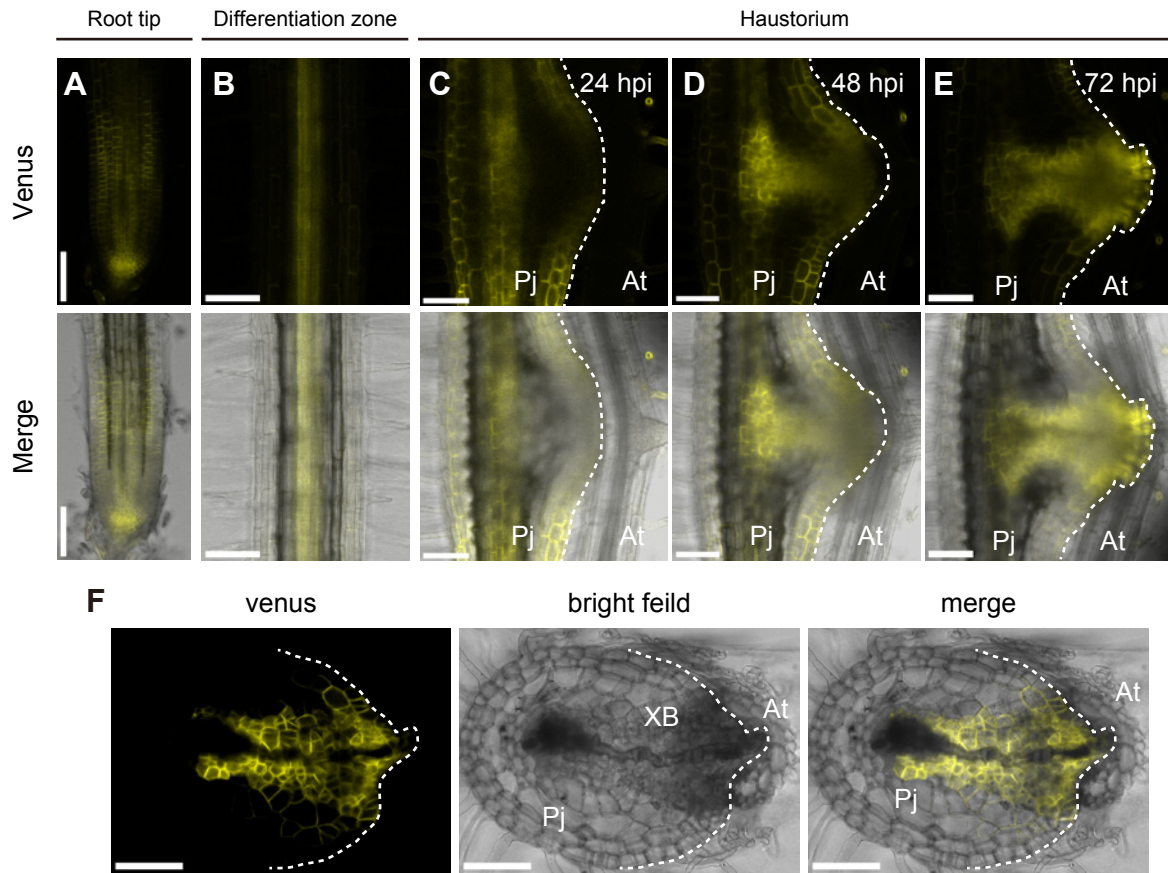

**Supplementary figure 6. The expression pattern of *PjHB8::3xVenus-SYP*.** The expression patterns in root tip and maturation zone and during haustorium formation are shown as indicated (A)- (E) (n = 4). (F) The hasutorium shown in (E) was hand-sectioned at the middle of the haustorium and examined using a confocal microscope. White line marks the outline of haustorium. Venus fluorescence is in yellow. Bright field images and Venus fluorescent images are merged. Three out of three hairy roots showed the same expression pattern. hpi, hours post infection; Pj, *P. japonicum* root; At, *A. thaliana* root; XB, xylem bridge. Bars = 100  $\mu$ m.

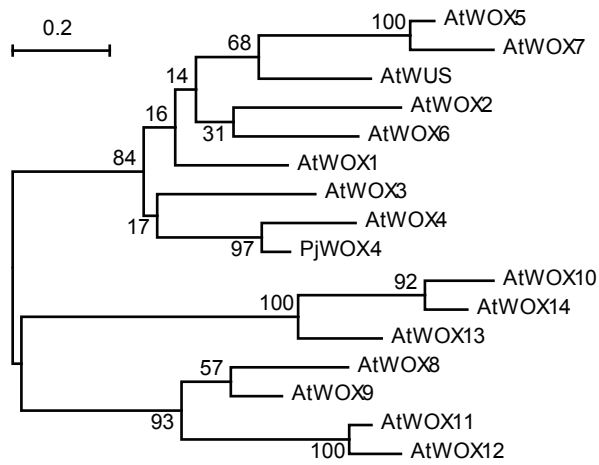

**Supplementary figure 7. The phylogenetic tree for *A. thaliana* (At) WOX gene family and *P. japonicum* (Pj) WOX4 .**

Scale bar represents amino acid substitutions per site.

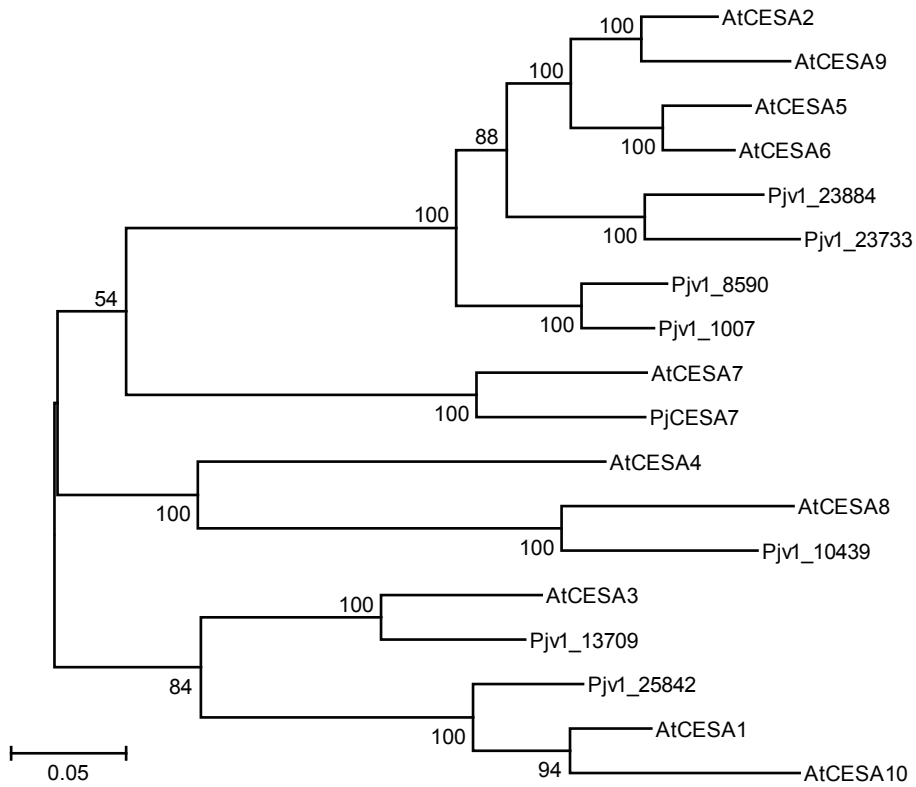

**Supplementary figure 8.** The phylogenetic tree for *A. thaliana* (At) and *P. japonicum* (Pj) CESA gene family. Scale bar represents amino acid substitutions per site.



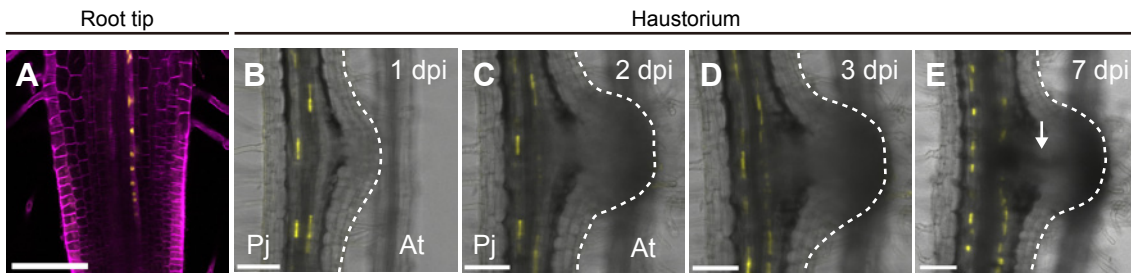

**Supplementary figure 9. The expression pattern of *AtAPL::3xVenus-NLS* in *P. japonicum*.** (A)-(E) The expression patterns in root tip and during haustorium formation are shown as indicated. White line marks the outline of haustorium. Venus fluorescence is in yellow. Direct red 23 staining is in magenta. A Venus fluorescent images and a direct red 23 fluorescent image are merged in (A) (n = 3). Bright field images and Venus fluorescent images are merged in (B)-(E). The same haustorium is shown in (B)-(E). Five out of seven hairy roots showed the same expression pattern. dpi, days post infection; Pj, *P. japonicum* root; At, *A. thaliana* root. Bars = 100  $\mu$ m.

Supplemental Table 1

| name            | sequence                                                              | purpose         |
|-----------------|-----------------------------------------------------------------------|-----------------|
| PjHB15apro-f1   | TTGGTCTCAACATGGAGCCGATTGCTTGTGTTTATG                                  | promoter        |
| PjHB15apro-r1   | TTGGTCTCAACAAAAATAGAAGGCATGGGGGA                                      |                 |
| PjHB15apro-f2   | TTGGTCTCAACATATTTTCTCTTTCTCTGCTCATT                                   |                 |
| PjHB15apro-r2   | TTGGTCTCAACAACATTCTCAGTCCTTAATTA                                      |                 |
| PjHB15bpro-f1   | TTGGTCTCAACATGGAGAGTTGAGTTAGCAGA                                      | promoter        |
| PjHB15bpro-r1   | TTGGTCTCAACAACGCAGAAAATGTACCCTAAA                                     |                 |
| PjHB15bpro-f2   | TTGGTCTCAACATTGCGACATACAAAAAGAAAAGC                                   |                 |
| PjHB15bpro-r2   | TTGGTCTCAACAACATTCTCTCACTAATTTTTTTTTTTCAGC                            |                 |
| PjWOX4-ggf1     | TTGGTCTCAACATGGAGTTCACCGGTCGGTTTTTAAA                                 | promoter        |
| PjWOX4-ggr1     | TTGGTCTCAAGCCACTTTTACCACCAAATCT                                       |                 |
| PjWOX4-ggf2-2   | TTGGTCTCAGGCTCTCATATTCTTAAAAAATGAGA                                   |                 |
| PjWOX4-ggr2-2   | TTGGTCTCAACAAGTGTCTCATTAACAGCTGAATG                                   |                 |
| PjWOX4-ggf3     | TTGGTCTCAACATGCACACACCACATATCCGTATC                                   |                 |
| PjWOX4-ggr3     | TTGGTCTCAGTAGTAATTAGATGGTGGGGGG                                       |                 |
| PjWOX4-ggf4     | TTGGTCTCACTACAGACCACTTTCCCATTTT                                       |                 |
| PjWOX4-ggr4     | TTGGTCTCAACAACATTTTTATGATGGGGGCAAAAT                                  |                 |
| PjCASP1pro-ggf1 | TTGGTCTCAACATGGAGACGGCGCCAAAATGATG                                    |                 |
| PjCASP1pro-ggr1 | TTGGTCTCAACAACAATAACAATAGAGCAGCCAGT                                   |                 |
| PjCASP1pro-ggf2 | TTGGTCTCAACATATTGTACGTCGTGATCCTTG                                     |                 |
| PjCASP1pro-ggr2 | TTGGTCTCAACAACATTCTTCTTTGTTTCTTTTGGTTA                                |                 |
| Venus-NTf1      | TTGAAGACAAAATGGTGAGCAAGGGCGA                                          | coding region   |
| Venus-NTr1      | TTGAAGACAAAACCTTTGTACAGCTCGTCCATGCC                                   |                 |
| PjCASP1-ggf3    | TTGAAGACAAAAGGTATGGAGAAAAGTGAATCAACC                                  | coding region   |
| PjCASP1-ggr3    | TTGAAGACAAAAGCTTAATGTTTTTTTAGAGCTATAGCC                               |                 |
| PjCASP1-ggf4    | TTGAAGACAAGCTTTTGAACAAAAAAGATATATTA                                   | 3'UTR region    |
| PjCASP1-ggr4    | TTGAAGACAATGACGGGCTTTTCGAG                                            |                 |
| PjCASP1-ggf5    | TTGAAGACAAGTCATCCAGCCCGGAAA                                           |                 |
| PjCASP1-ggr5    | TTGAAGACAAGCGGCCAAAATCGGGAA                                           |                 |
| AtCO2-ggf1      | TTGAAGACAAGGAGAGTATTGGGCCTTTTG                                        |                 |
| AtCO2-ggr1      | TTGAAGACAACATTATCGTTATTAAGGGTTC                                       |                 |
| PjCESA7-ggf1    | TTGAAGACAAGGAGTTGACCTGTGTGCCGGA                                       | promoter        |
| PjCESA7-ggr1    | TTGAAGACAACATTGGTGGTGGTGGTGCAG                                        |                 |
| PjACT-ggf1      | TTGGTCTCAACATGGAGCTCGCTGGTTTTCTTTTAA                                  | promoter        |
| PjACT-ggr1      | TTGGTCTCAACAAAGATTTTGAATGGCAATGAG                                     |                 |
| PjACT-ggf2      | TTGGTCTCAACATATCTAAAATCACTCCCAAAT                                     |                 |
| PjACT-ggr2      | TTGGTCTCAACAACATTCTCTTATTCTGAGGAACAAA                                 |                 |
| AtSYP122-ggf1   | TTGGTCTCAACATATCGATGAACGATCTTCTCTCG                                   | coding region   |
| AtSYP122-ggr1   | TTGGTCTCATCCTCGTTTACAACCTCCACG                                        |                 |
| AtSYP122-ggf2   | TTGGTCTCAAGGACCTTAAAGAGCTAGATCG                                       |                 |
| AtSYP122-ggr2   | TTGGTCTCAACAAAAGCTTAGCGTAGTAGCCGCC                                    |                 |
| LoxmC-f         | TTGGTCTCAACATCCATAACTTCGTATAGCATACATTATACGAAGTTATATGGTGAGCAAGGGCG     | loxP site       |
| LoxmC-r         | TTGGTCTCAACAACCTTGTACAGCTCGTCCA                                       |                 |
| LoxSYPter-f     | TTGGTCTCAACATATCCATGAACGATCTTCTC                                      | loxP site       |
| LoxSYPter-r     | TTGGTCTCAACAACATTATAACTTCGTATAATGTATGCTATACGAAGTTATCGCCTCGTTTTACTCTAT |                 |
| PjACT-ggff      | TTGAAGACAAGGAGCTCGCTGGTTTT                                            | promoter        |
| PjACT-ggfr      | TTGAAGACAAAATGGCTCTTATTCTGAGGAACAAAA                                  |                 |
| PjHB8-GAf       | GTGCATCCTCGTAAGGAGAAAAACCCAAAAAAGACA                                  | promoter        |
| PjHB8-GAr       | CCTTGCTCACCATTCTCACTTCAACAAAATCAAAGACA                                |                 |
| Lv2SYP-GAf1     | GAGAATGGTGAGCAAGGG                                                    | vector backbone |
| Lv2SYP-GAr1     | CCTTACGAGGATGCACA                                                     |                 |
| PjSCRpro-f      | CACCATTTGGTGCCTTTTCATGGGGTT                                           | promoter        |
| PiSCRpro-r      | CTTGGCGGTGCTGCTGCTTT                                                  |                 |
| AtAPLpro-f1     | TTGGTCTCAACATGGAGTGGGGAAAAGATAAGAAG                                   | promoter        |
| AtAPLpro-r1     | TTGGTCTCAACAACCCCTAAATTCAATTGCATGC                                    |                 |
| AtAPLpro-f2     | TTGGTCTCAACATGGGGTTAATCTAAATCGAAGC                                    |                 |
| AtAPLpro-r2     | TTGGTCTCAACAACATTCTCTCTCTCTCTCTCT                                     |                 |

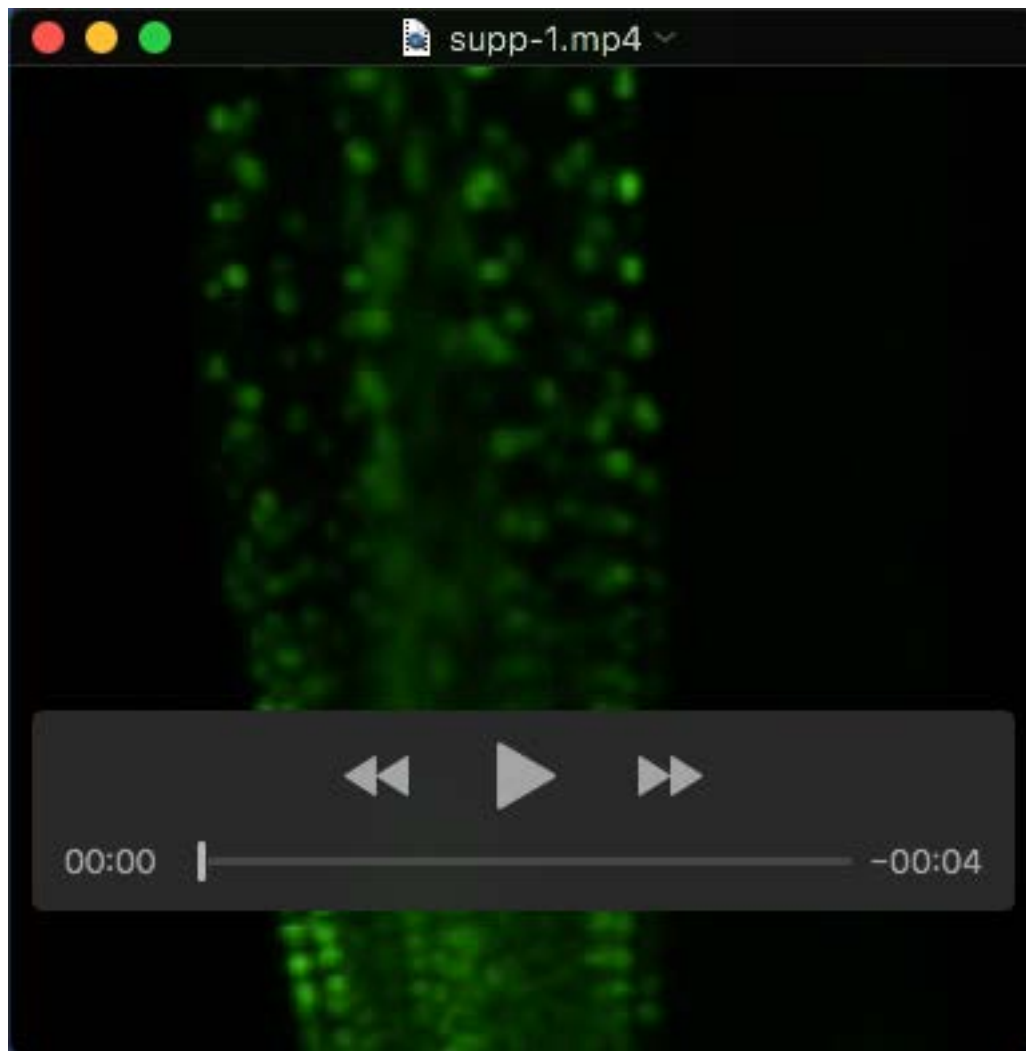

**Movie 1. Time-lapse observation of nuclear behavior during early haustorium development.** *P. japonicum* root expressing nuclear localized GFP was used to track cell division. Confocal photos were taken at 20 minutes intervals for 14 hours (6 hpi ~ 20 hpi). GFP fluorescent is shown in green.

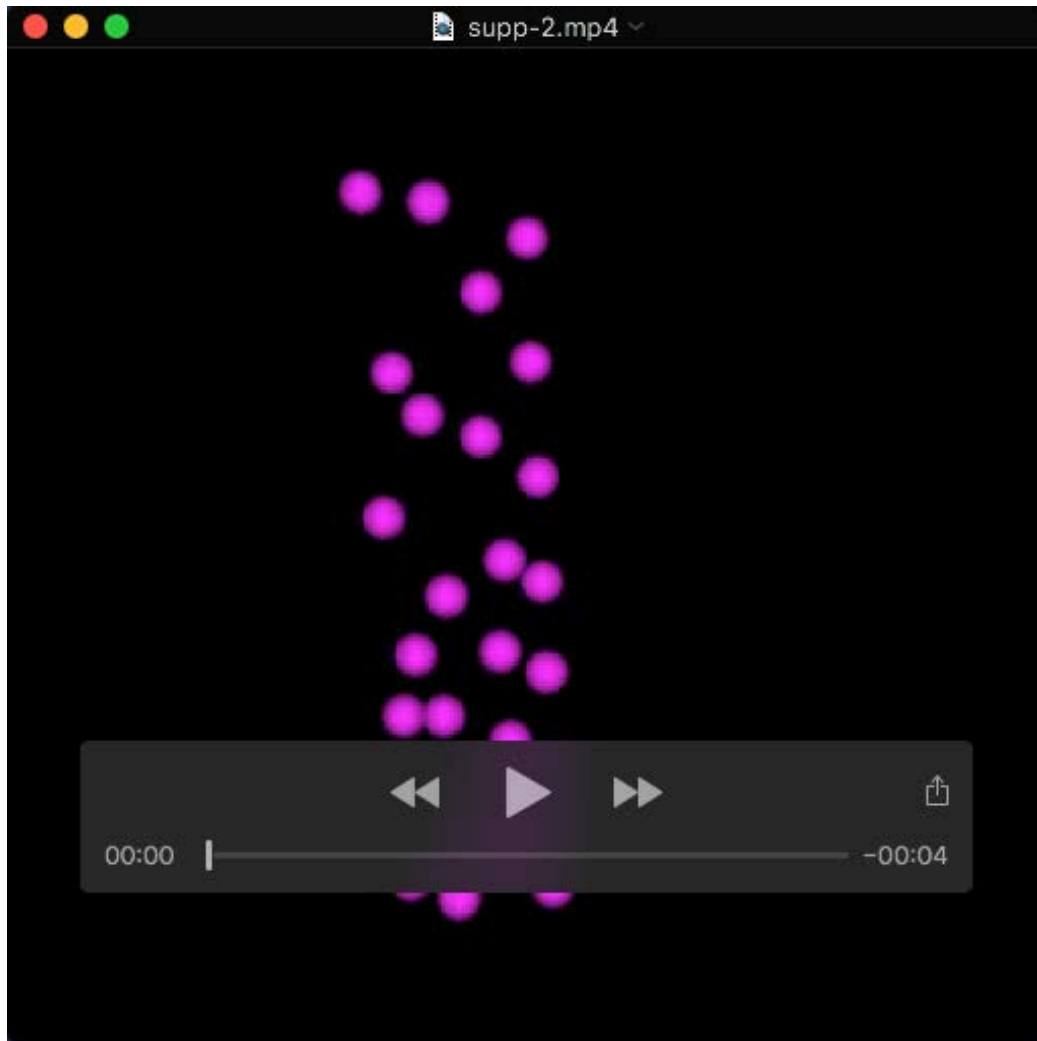

**Movie 2. Nuclei tracking in outer cell layers during early haustorium development.** The result of nuclei tracking using the Trackmate software based on the time-lapse confocal observation shown in movie 1. Outer cell layers, including epidermis (single layer), cortex (two layers), and endodermis (single layer), are shown from right. Purple circle indicates one nucleus.

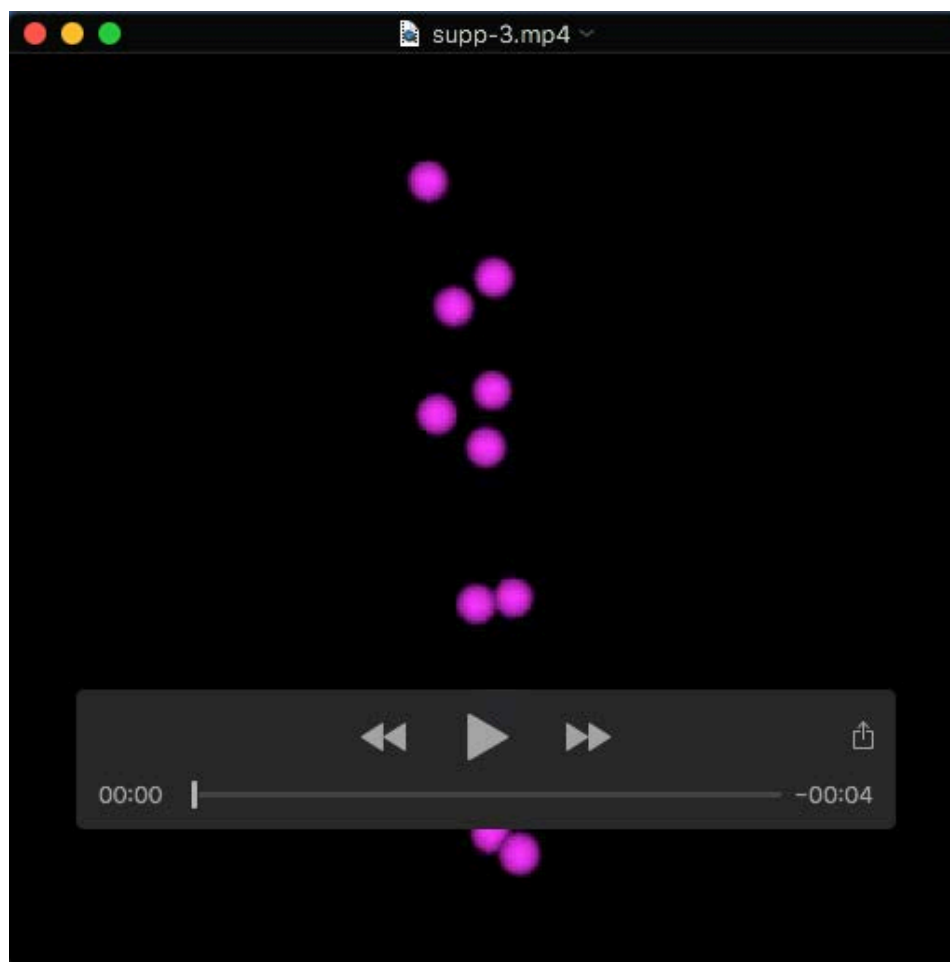

**Movie 3. Nuclei tracking in inner cell layers during early haustorium development.** The result of nuclei tracking using the Trackmate software based on the time-lapse confocal observation shown in movie 1. Inner cell layers, including pericycle and vascular cell, are shown. Purple circle indicates one nucleus.
